# Supplementary material
Source: PubMed Central journal article supplement (PMC7953085)
Supplement: sj-pdf-1-vdi-10.1177_1040638720933875.pdf [file sj-pdf-1-vdi-10.1177_1040638720933875.pdf]

JVDI: Supplementary material

Mitchell PK, et al. Method comparison of targeted influenza A virus typing and whole-genome sequencing from respiratory specimens of companion animals

**Supplementary Table 1.** List of strain names, NCBI accessions, and U.S. state.

| Strain                                         | State | PB2      | PB1      | PA       | HA       | NP       | NA       | M        | NS       |
|------------------------------------------------|-------|----------|----------|----------|----------|----------|----------|----------|----------|
| A/Canis lupus familiaris/USA/000915/2018(H3N2) | KY    | MK690062 | MK690061 | MK690060 | MK690059 | MK690058 | MK690057 | MK690056 | MK690055 |
| A/Canis lupus familiaris/USA/006974/2018(H3N2) | CA    | MK690070 | MK690069 | MK690068 | MK690067 | MK690066 | MK690065 | MK690064 | MK690063 |
| A/Canis lupus familiaris/USA/007780/2018(H3N2) | KY    | MK690078 | MK690077 | MK690076 | MK690075 | MK690074 | MK690073 | MK690072 | MK690071 |
| A/Canis lupus familiaris/USA/007781/2018(H3N2) | CA    | MK690086 | MK690085 | MK690084 | MK690083 | MK690082 | MK690081 | MK690080 | MK690079 |
| A/Felis catus/USA/047732/2018(H1N1)            | CT    | MK690094 | NA*      | MK690092 | MK690091 | MK690090 | MK690089 | MK690088 | MK690087 |

Influenza A virus whole-genome sequencing

|                                                |    |          |          |          |          |          |          |          |          |
|------------------------------------------------|----|----------|----------|----------|----------|----------|----------|----------|----------|
| A/Equus caballus/USA/149632/2018(H3N8)         | NY | MK690102 | MK690101 | MK690100 | MK690099 | MK690098 | MK690097 | MK690096 | MK690095 |
| A/Canis lupus familiaris/USA/150620/2018(H3N2) | MI | MK690110 | MK690109 | MK690108 | MK690107 | MK690106 | MK690105 | MK690104 | MK690103 |
| A/Canis lupus familiaris/USA/152386/2018(H3N2) | MI | MK690118 | MK690117 | MK690116 | MK690115 | MK690114 | MK690113 | MK690112 | MK690111 |
| A/Equus caballus/USA/154390/2018(H3N8)         | VT | MK690126 | MK690125 | MK690124 | MK690123 | MK690122 | MK690121 | MK690120 | MK690119 |
| A/Canis lupus familiaris/USA/188191/2017(H3N2) | OH | MK690134 | MK690133 | MK690132 | MK690131 | MK690130 | MK690129 | MK690128 | MK690127 |
| A/Canis lupus familiaris/USA/188203/2017(H3N2) | OH | MK690142 | MK690141 | MK690140 | MK690139 | MK690138 | MK690137 | MK690136 | MK690135 |
| A/Canis lupus familiaris/USA/188226/2017(H3N2) | OH | MK690150 | MK690149 | MK690148 | MK690147 | MK690146 | MK690145 | MK690144 | MK690143 |
| A/Canis lupus familiaris/USA/188297/2017(H3N2) | OH | MK690158 | MK690157 | MK690156 | MK690155 | MK690154 | MK690153 | MK690152 | MK690151 |

Influenza A virus whole-genome sequencing

|                                                  |    |          |          |          |          |          |          |          |          |
|--------------------------------------------------|----|----------|----------|----------|----------|----------|----------|----------|----------|
| A/Canis lupus familiaris/USA /188305/ 2017(H3N2) | KY | MK690166 | MK690165 | MK690164 | MK690163 | MK690162 | MK690161 | MK690160 | MK690159 |
| A/Canis lupus familiaris/USA /218592/ 2017(H3N2) | CA | MK690174 | MK690173 | MK690172 | MK690171 | MK690170 | MK690169 | MK690168 | MK690167 |
| A/equine/NC /048519/ 2019(H3N8)                  | NC | MT212114 | MT212115 | MT212116 | MT212117 | MT212118 | MT212119 | MT212120 | MT212121 |
| A/equine/AL /051053/ 2019(H3N8)                  | AL | MT212122 | MT212123 | MT212124 | MT212125 | MT212126 | MT212127 | MT212128 | MT212129 |
| A/equine/NY /053954/ 2019(H3N8)                  | NY | MT212130 | MT212131 | MT212132 | MT212133 | MT212134 | MT212135 | MT212136 | MT212137 |
| A/equine/PA /072778/ 2019(H3N8)                  | PA | MT212138 | MT212139 | MT212140 | MT212141 | MT212142 | MT212143 | MT212144 | MT212145 |
| A/equine/ME /082889/ 2019(H3N8)                  | ME | MT212146 | MT212147 | MT212148 | MT212149 | MT212150 | MT212151 | MT212152 | MT212153 |
| A/equine/GA /168830/ 2019(H3N8)                  | GA | MT212084 | NA*      | MT212085 | MT212086 | MT212087 | MT212088 | MT212089 | MT212090 |
| A/equine/NH /176576/ 2019(H3N8)                  | NH | MT212098 | MT212099 | MT212100 | MT212101 | MT212102 | MT212103 | MT212104 | MT212105 |
| A/equine/OH /218776/ 2018(H3N8)                  | OH | MT212106 | MT212107 | MT212108 | MT212109 | MT212110 | MT212111 | MT212112 | MT212113 |

Influenza A virus whole-genome sequencing

|                                       |    |          |     |          |          |          |          |          |          |
|---------------------------------------|----|----------|-----|----------|----------|----------|----------|----------|----------|
| A/equine/NY/2<br>20792/<br>2018(H3N8) | NY | MT212091 | NA* | MT212092 | MT212093 | MT212094 | MT212095 | MT212096 | MT212097 |
|---------------------------------------|----|----------|-----|----------|----------|----------|----------|----------|----------|

\* Segment not uploaded because of poor coverage by both methods.

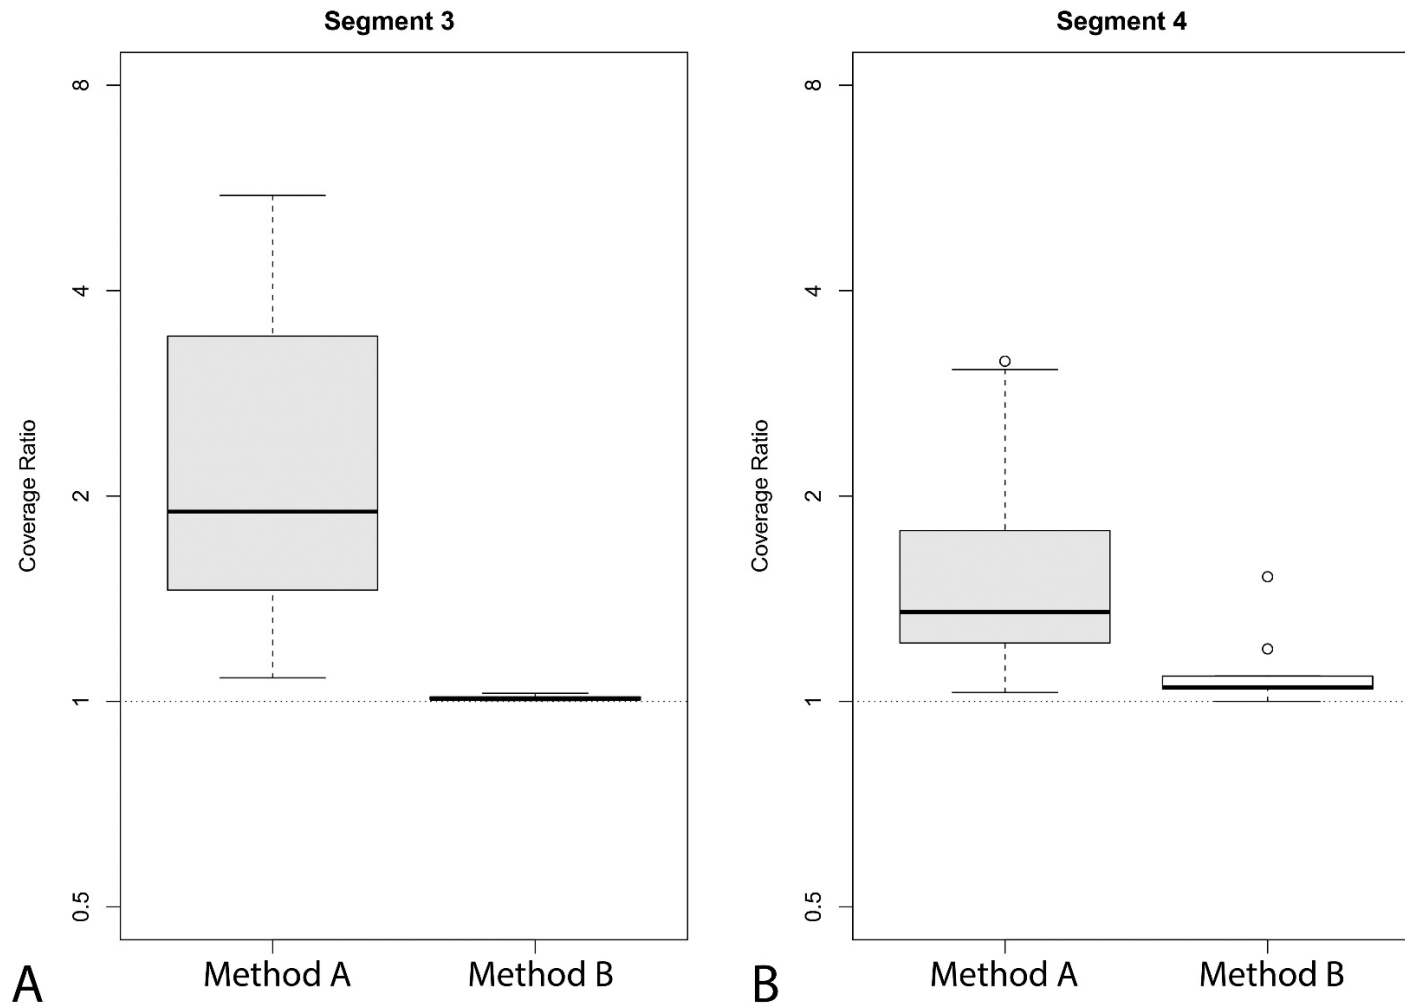

**Supplementary Figure 1.** Boxplot of ratio of coverage depth between **A.** bases 1,482 and 1,481 of segment 3 and **B.** bases 1,076 and 1,075 of segment 4 for set 1 H3N2 samples.

## Influenza A virus whole-genome sequencing

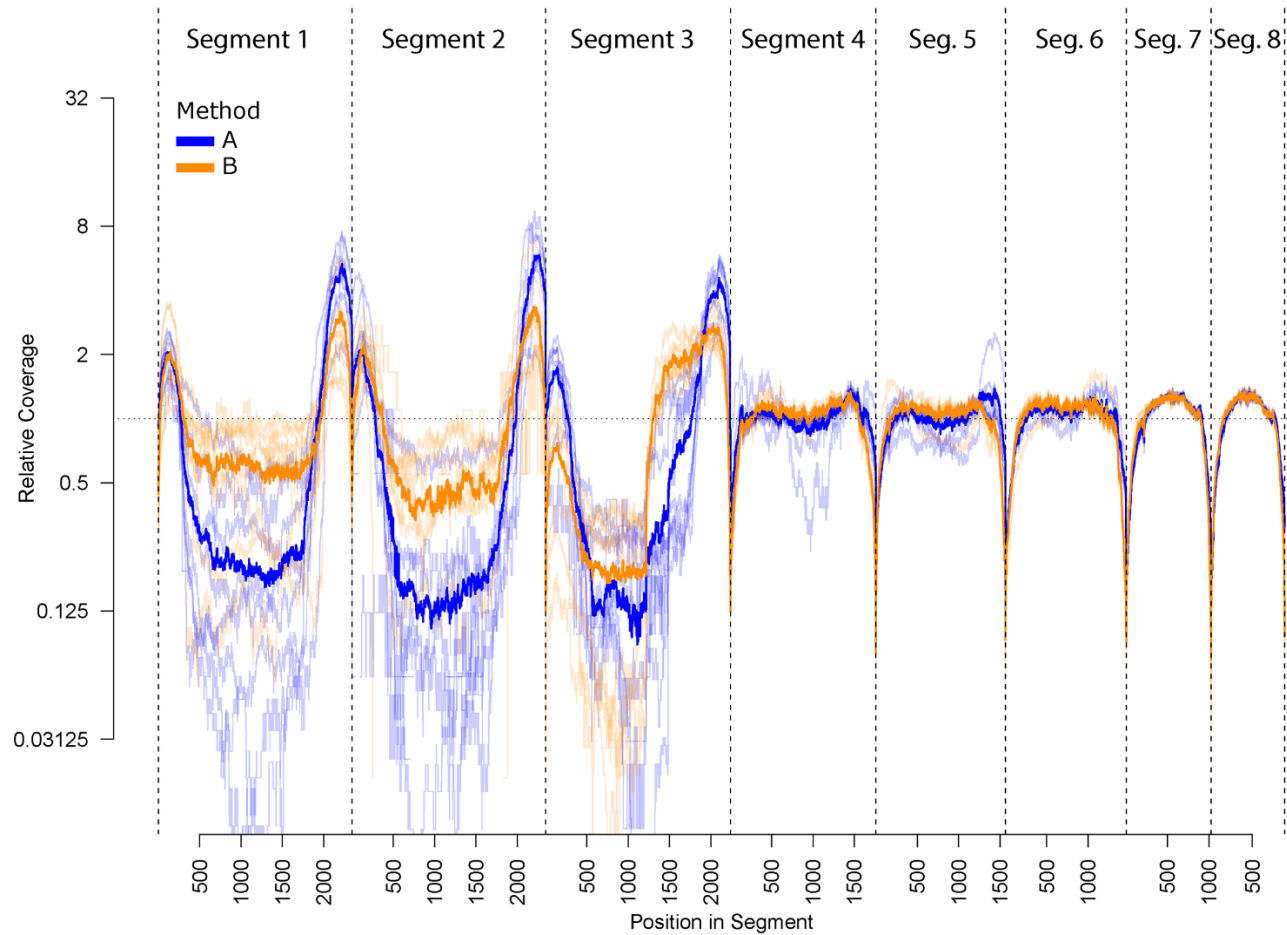

**Supplementary Figure 2.** Relative coverage across each segment for set 2 H3N8 samples, with data for method A shown in blue and method B in orange. Each sample is represented by a light line, and the mean value for the method is shown as a dark line. The relative coverage for each base position is the number of reads at the base divided by the average coverage depth of the segment for a given sample.
